# Supplementary material
Source: Springer Nature journal article supplement (https://www.springermedizin.de/resource/supplementary/12936_2011_1893_MOESM1_ESM.pdf/9541972)

Subject SCH    GCR B-104'536  
Age            3 years  
Sex            male  
Weight        13.2 kg

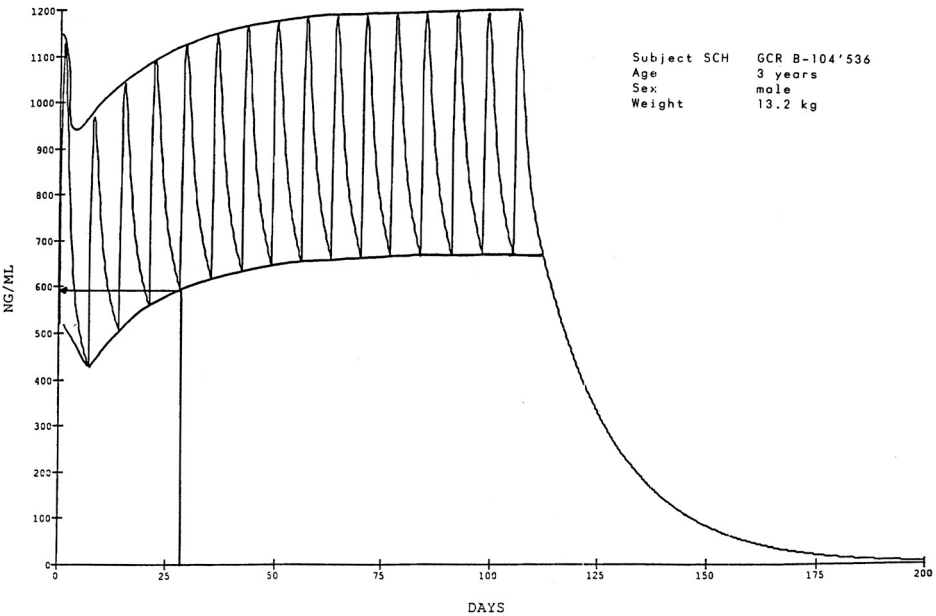

Supplement: MOESM1 [file 9541972]
